# Supplementary material for: Electrohydrodynamic printing of silver nanowires for flexible and stretchable electronics
Source: Royal Society of Chemistry journal article supplement (doi:10.1039/c7nr09570h), 2018-01-01
Supplement: c7nr09570h1.pdf [file c7nr09570h1.pdf]

## Supporting Information

### Electrohydrodynamic Printing of Silver Nanowires for Flexible and Stretchable Electronics

Zheng Cui, Yiwei Han, Qijin Huang, Jingyan Dong\* and Yong Zhu\*

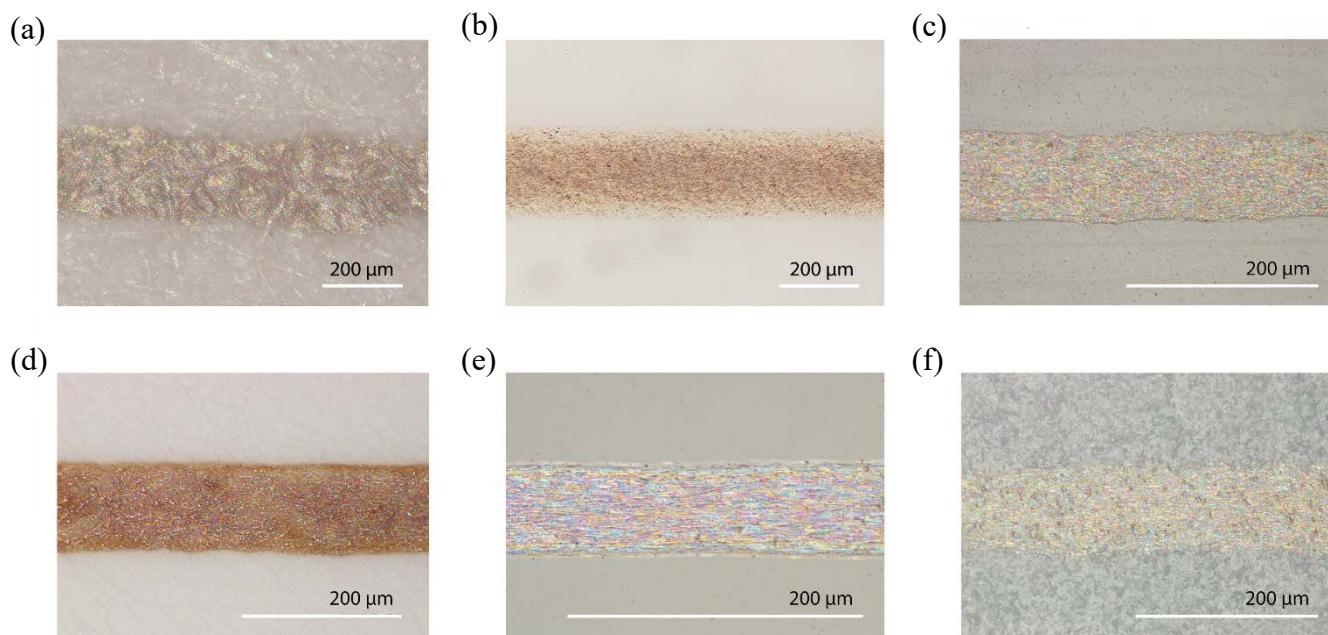

Figure S1. Optical images of AgNW lines printed on various substrates. a) letter paper, b) glass, c) PET, d) nanofiber paper, e) PDMS and f) polycarbonate filter.

(a)

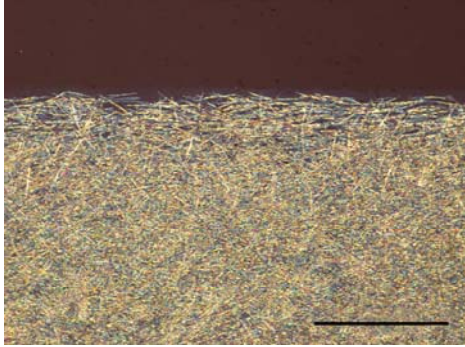

(b)

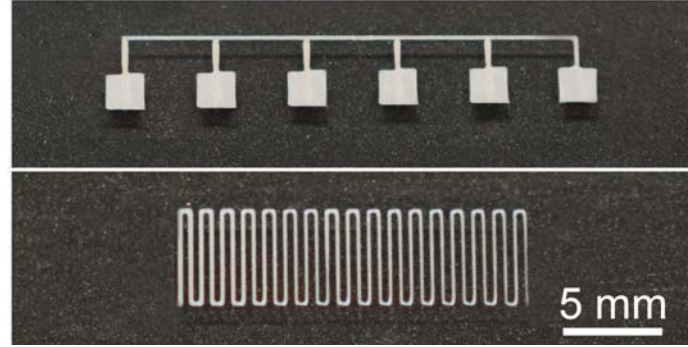

Figure S2. a) Optical image shows the sharp edge of printed AgNW and dense AgNW network. Scale bar is 50  $\mu\text{m}$ . b) Additional AgNW patterns printed on glass slide.

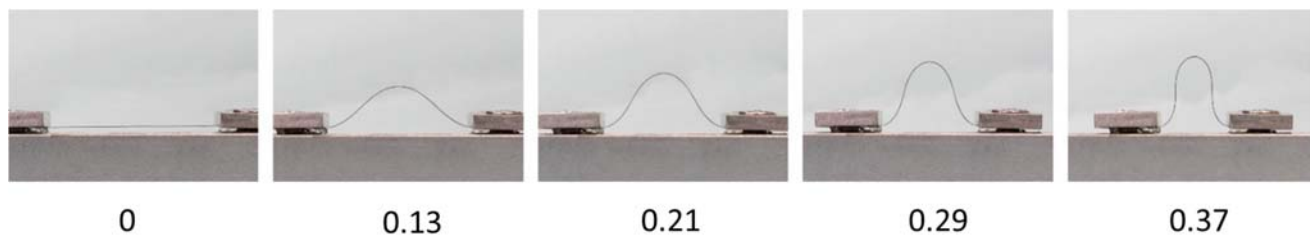

Figure S3. Consecutive images of bending test from original to final state (Bending curvatures are marked below respectively). Unit:  $\text{mm}^{-1}$ .

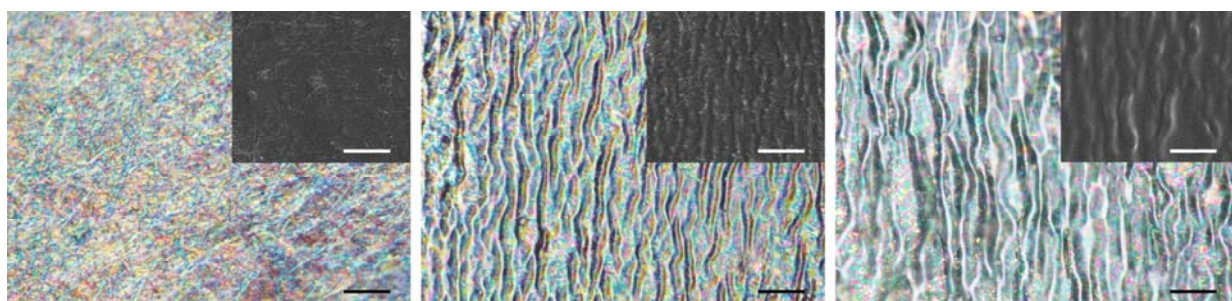

Pre-strained 50%

Pre-strained 30%

Strain released

Figure S4. Optical and SEM (inset) images of AgNW/PDMS sample under pre-strained and released conditions. Scale bar is 10  $\mu\text{m}$ .

(a)

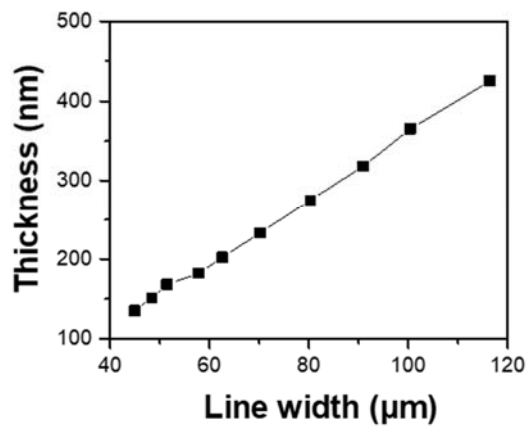

(b)

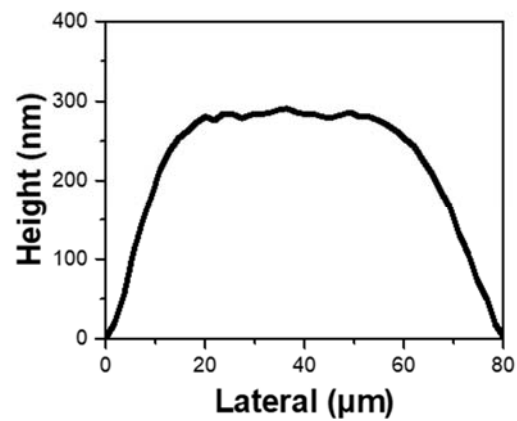

Figure S5. a) The thickness of printed line decreases as the printing speed increases. b) Profile image of printed AgNW line with a line width of  $\sim 80 \mu\text{m}$ .
